# Supplementary material for: Lipid droplets maintain lipid homeostasis during anaphase for efficient cell separation in budding yeast
Source: PubMed Central journal article supplement — Mol Biol Cell. 2016 Aug 1;27(15):2368–80. doi: 10.1091/mbc.E16-02-0106 (PMC4966979; doi:10.1091/mbc.e16-02-0106), 2016-08-01
Supplement: supp_E16-02-0106v1_CombinedSupMats.pdf [file supp_E16-02-0106v1_CombinedSupMats.pdf]

# Supplemental Materials

*Molecular Biology of the Cell*

Yang et al.

### Supplemental Figure Legends

**Figure S1.** LD-deficient mutant in BY4742 background strain displays cytokinesis defects. (A) The percentage of large-budded cells during release from nocodazole arrest. The graph represents mean  $\pm$  SD from three experiments ( $n > 150$ ). (B) Electron micrographs of the bud neck region in WT and the quadruple mutant cells at 1 hr after release from M phase. White arrowhead, asymmetric ingression of the primary septum; red arrowhead, inclusion of cytoplasmic materials; yellow arrowhead, aberrant septa; white arrow, inward growth of the cell wall. Bar, 500 nm. The table shows quantification of structural abnormality in large-budded cells from the electron micrographs.

**Figure S2.** The septin assembly is less stable in LD-deficient BY4742 background strain during cytokinesis. (A) Localization of Cdc10-GFP in cells released from M phase at indicated times. The merged images of DIC and Cdc10-GFP are shown. Bar, 5  $\mu$ m. (B) Montage images of Cdc10-GFP from representative cells corresponding to the time points in the plot. The signal intensity of Cdc10-GFP at the bud neck was plotted covering 7 min before and 8 min after the signal declines during release from M phase.

**Figure S3.** Localization of Chs1 to cell periphery is not affected by LD deficiency. Chs1-3GFP was visualized in WT and the quadruple mutant released from mitotic arrest at indicated times. Bar, 5  $\mu$ m.

**Figure S4.** Bni1 persists at the bud neck. WT and the LD-deficient quadruple mutant expressing Bni1-3GFP was released from mitotic arrest for indicated times. The arrowheads point to Bni1-3GFP at the new buds. Bar, 5  $\mu$ m. The percentage of cells with Bni1-3GFP at the bud neck was plotted as mean  $\pm$  SD from three independent experiments.

**Figure S5.** TAG levels are elevated during mitotic exit. Comparison of TAG species as indicated in WT under various growth conditions. Data (mean $\pm$ -SD) from three technical repeats of three independent experiments are shown.

**Figure S6.** The LD-deficient mutant has altered lipidome. Levels of various DAG, PA, PC, PI, and PE species in WT and the quadruple mutant cells grown exponentially (log phase), arrested at mitosis with nocodazole (M phase), or released from the arrest for 1 hr (M release). The data from three technical repeats of three independent experiments were plotted as mean  $\pm$  SD.

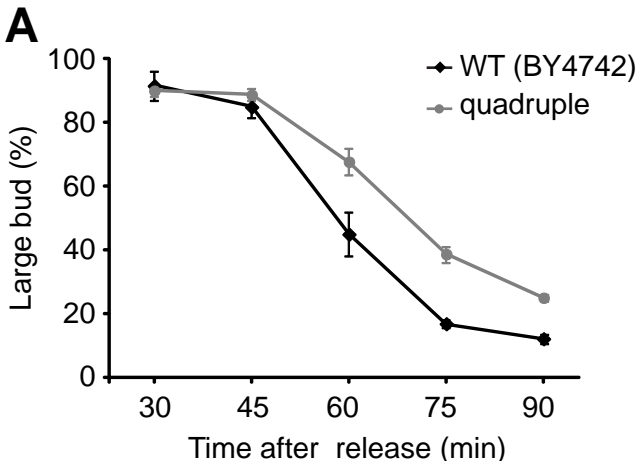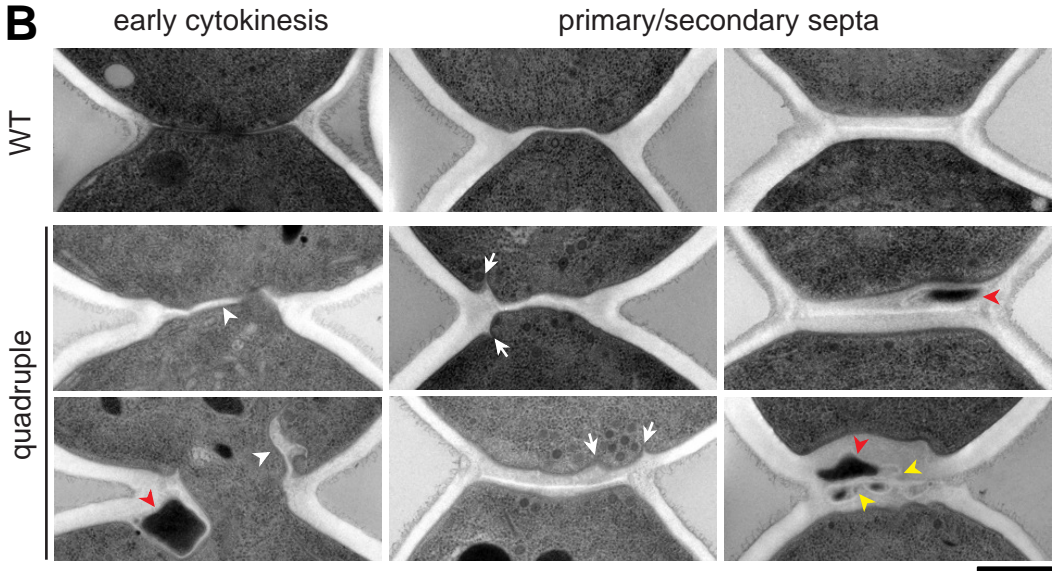

|                   | abnormal/total    |                |
|-------------------|-------------------|----------------|
|                   | early cytokinesis | complete septa |
| WT (N=92)         | 2/8               | 10/84          |
| quadruple (N=124) | 4/8               | 52/116         |

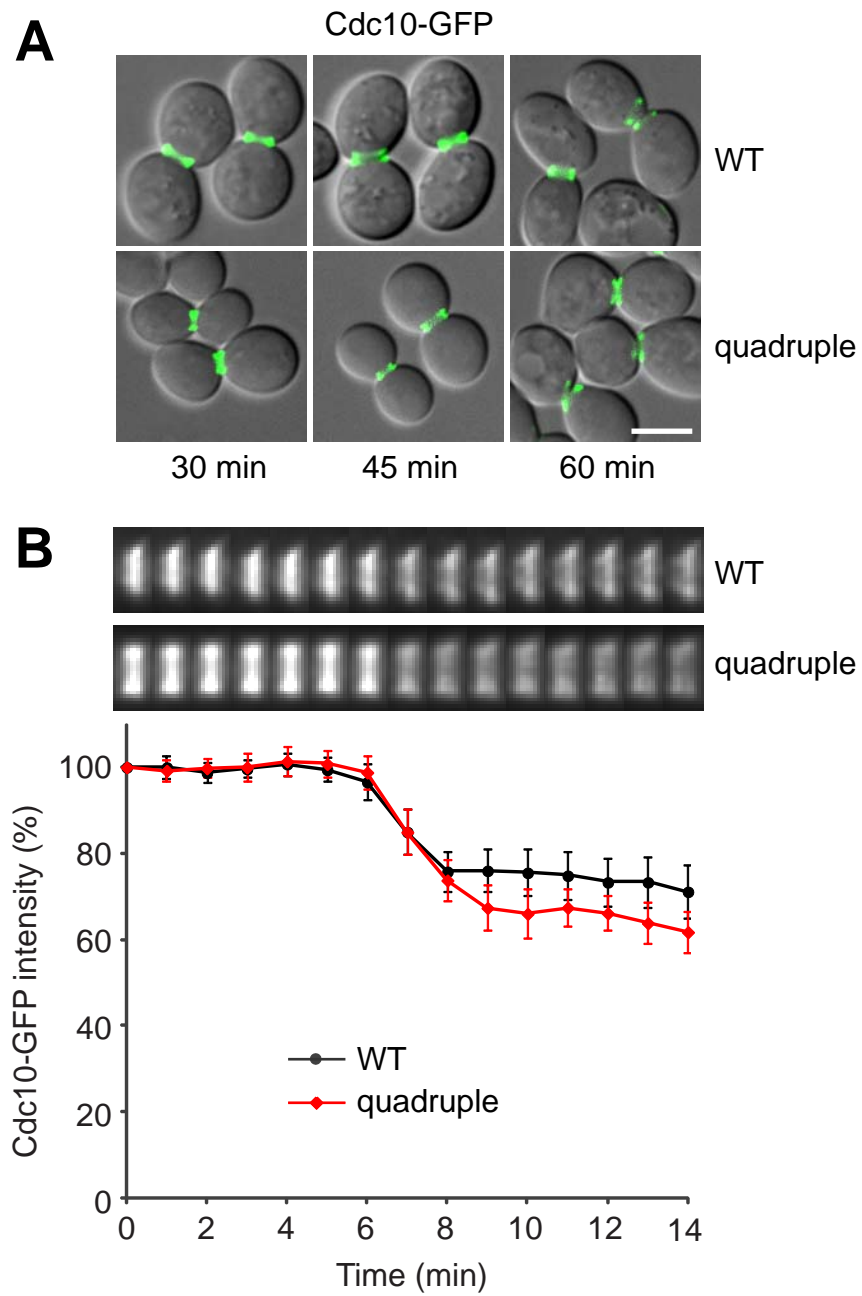

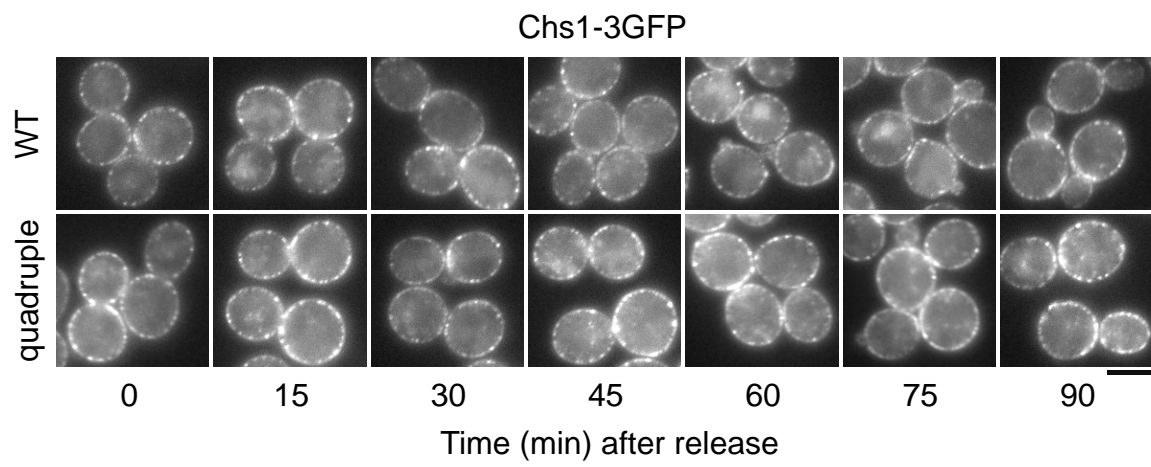

Figure S4

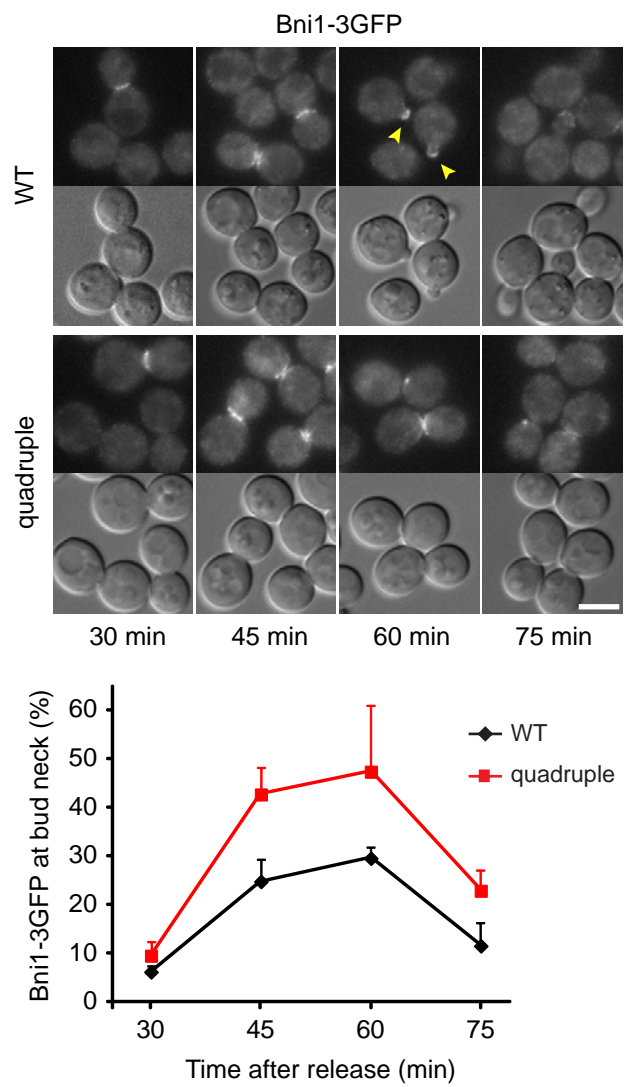

Figure S5

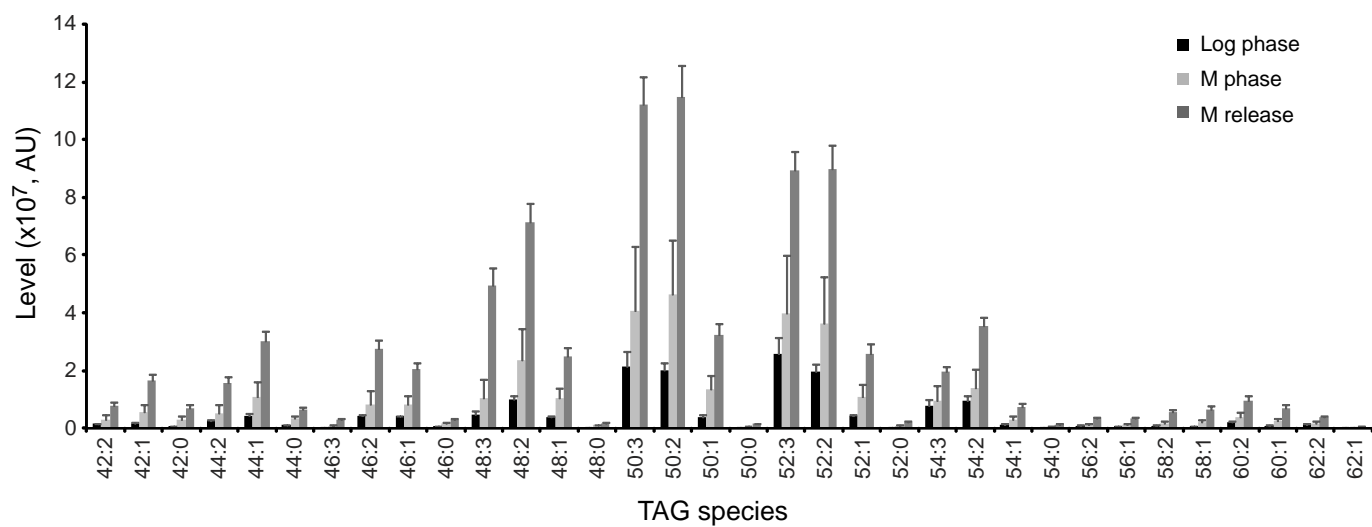

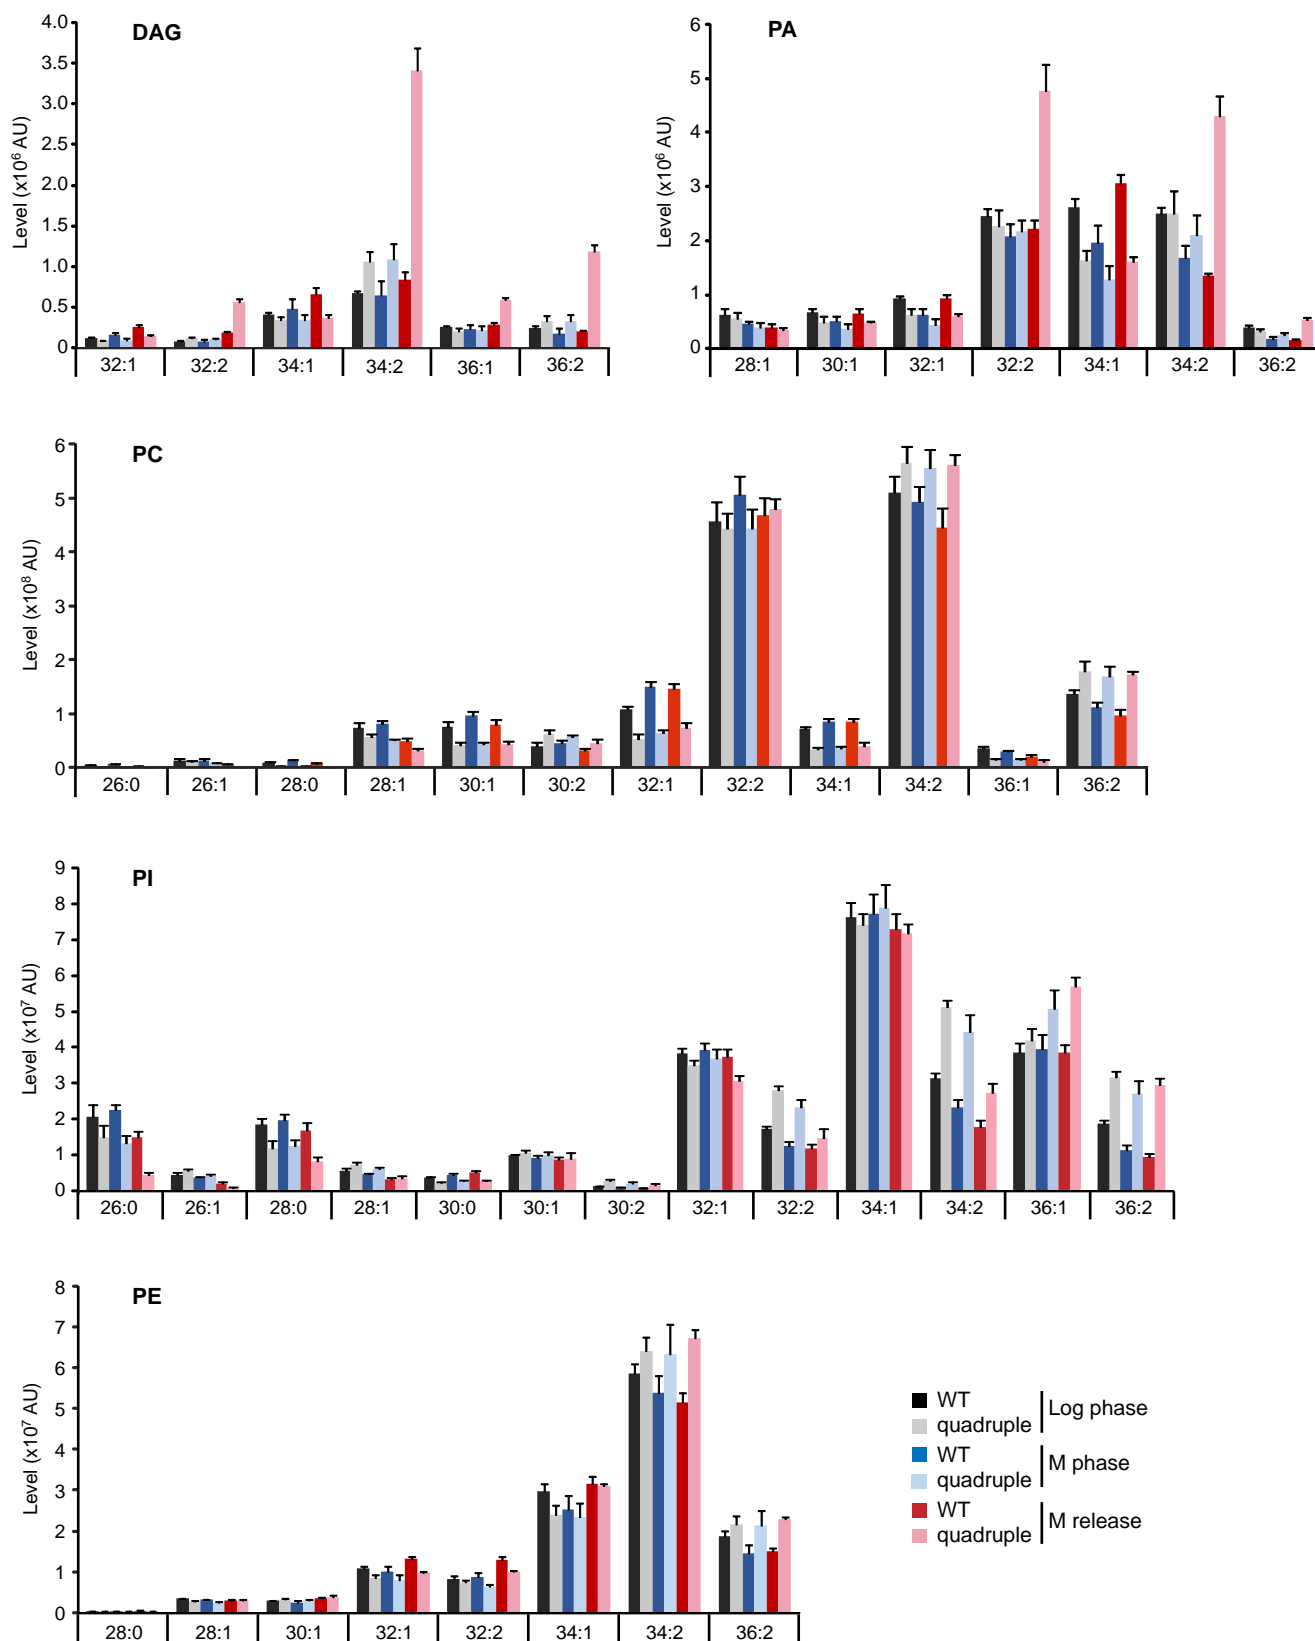



**Supplemental Table 1. Yeast strains used in the study**

| <b>Strains</b> | <b>Genotypes</b>                                                                             |
|----------------|----------------------------------------------------------------------------------------------|
| W303           | <i>MATa leu2-3,112 trp1-1 can1-100 ura3-1 ade2-1 his3-11,15 bar1Δ</i>                        |
| RHC4428        | W303 <i>are1Δ::TRP1 are2Δ::URA3 dga1Δ::hphMX6 lro1Δ::natMX6</i>                              |
| RHC747         | W303 <i>leu2::PDS1-8myc::LEU2</i>                                                            |
| RHC4643        | W303 <i>leu2::PDS1-8myc::LEU2 are1Δ::TRP1 are2Δ::URA3 dga1Δ:: hphMX6 lro1Δ::natMX6</i>       |
| RHC4367        | W303 <i>dga1Δ:: hphMX6 lro1Δ::natMX6</i>                                                     |
| RHC4642        | W303 <i>are1Δ::TRP1 are2Δ::URA3</i>                                                          |
| RHC4655        | W303 <i>exo84::EXO84-GFP::kanMX6</i>                                                         |
| RHC4654        | W303 <i>exo84::EXO84-GFP::kanMX6 are1Δ::TRP1 are2Δ::URA3 dga1Δ:: hphMX6 lro1Δ::natMX6</i>    |
| RHC4663        | W303 <i>myo1::MYO1-GFP::His3MX6</i>                                                          |
| RHC4664        | W303 <i>myo1::MYO1-GFP::His3MX6 are1Δ::TRP1 are2Δ::URA3 dga1Δ:: hphMX6 lro1Δ::natMX6</i>     |
| RHC4707        | W303 <i>chs2::CHS2-GFP::His3MX6</i>                                                          |
| RHC4703        | W303 <i>chs2::CHS2-GFP::His3MX6 are1Δ::TRP1 are2Δ::URA3 dga1Δ:: hphMX6 lro1Δ::natMX6</i>     |
| RHC4728        | W303 <i>cdc10::CDC10-GFP:: kanMX6</i>                                                        |
| RHC4727        | W303 <i>cdc10::CDC10-GFP:: kanMX6 are1Δ::TRP1 are2Δ::URA3 dga1Δ:: hphMX6 lro1Δ::natMX6</i>   |
| BY4742         | <i>MATα his3Δ1 leu2Δ0 lys2Δ0 ura3Δ0</i>                                                      |
| RHC2055        | BY4742 <i>are1Δ::LEU2 are2Δ::His3MX6 dga1Δ::kanMX6 lro1Δ:: hphMX6</i>                        |
| RHC4759        | BY4742 <i>cdc10::CDC10-GFP::URA3</i>                                                         |
| RHC4760        | BY4742 <i>cdc10::CDC10-GFP::URA3 are1Δ::LEU2 are2Δ::His3MX6 dga1Δ::kanMX6 lro1Δ:: hphMX6</i> |
| RHC4747        | W303 <i>bni1::BN11-3GFP:: His3MX6</i>                                                        |
| RHC4748        | W303 <i>bni1::BN11-3GFP:: His3MX6 are1Δ::TRP1 are2Δ::URA3 dga1Δ:: hphMX6 lro1Δ::natMX6</i>   |
| RHC4790        | W303 <i>chs1::CHS1-3GFP:: His3MX6</i>                                                        |
| RHC4791        | W303 <i>chs1::CHS1-3GFP:: His3MX6 are1Δ::TRP1 are2Δ::URA3 dga1Δ:: hphMX6 lro1Δ::natMX6</i>   |
